# Supplementary material for: Perceived climate change impacts and adaptation responses in ten African mountain regions
Source: Springer Nature journal article supplement (doi:10.1038/s41558-024-02221-w), 2025-01-06
Supplement: MOESM1 [file 41558_2024_2221_MOESM1_ESM.pdf]

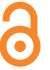

---

# Perceived climate change impacts and adaptation responses in ten African mountain regions

---

In the format provided by the authors and unedited

---

## Supplementary material A. Semi-structured questionnaires.

Note that focus-group discussions were used to create the list of wealth items (question 8, see supplementary material B) and amend questions 10-13 to those relevant to each study area.

1. Village name
2. Household number
3. Household composition (adults M and F)
4. Owner of house (Y/N)
5. Owner of farm (Y/N)
6. Farm size (ha)
7. List all the livestock your household has
8. Does your household have any of these items?
9. Did you complete primary school? (Y/N)
10. Compared to when you were a teenager and started farming, which of the following climatic changes have you noticed in your village? Increased temperatures (dry season)/ Reduced rainfall (long rains)/Late start long rains/ More dry spells (long rains)/ More showers (dry season)/ More extreme floods/ More extreme droughts/ Fewer foggy days (rainy season)/ Less frost/ Increased wind strength (rainy season)/ Fewer hailstorms
11. Compared to when you were a teenager and started farming, which of the following impacts changes have you noticed in your village? Reduced stream flow (rainy season)/ More landslides (rainy season)/ More soil erosion (rainy season)/ Lower yields (main staple)/ Lower yields (coffee)/ Increased pests/diseases (main staple) / Increased pests/diseases (coffee) / Cows produce less milk / Livestock have more diseases / People are less healthy
12. Which of the following on-farm adaptation strategies have you used? Change to improved variety (main crop)/ Changed planting date / Sow seeds twice (if they die) / Increased use soil conservation (ditch, terrace, mulching)/ Increased use fertiliser / Increased use pesticide / Changed farm location (near stream) / Increased irrigation / Increased farm size / Change to improved variety (coffee) / Increase shade (coffee) / Increase inputs (coffee)/ Change to new crop
13. Which of the following other adaptation strategies have you used? Increased use veterinary care / Increased use feed (cows) / Diversify: labour / Diversify: started rearing animals / Diversify: vegetable/fruit production / Diversify: sell firewood / Diversify: business / Diversify: timber / Diversify: mining.
14. How you determine when to sow your seeds? You might gather information from... Tv or radio / extension services / elders or traditional authorities / your own personal experience / other (explain)
15. Have you heard the concept 'Climate Change'? If yes, can you explain what it means and who explained it to you?

## Supplementary material B. Wealth items

Note that focus-group discussions were used to create a list of 10 wealth items relevant to each study area. BAM: Bamboutos Mountains (Cameroon), ITO: Itombwe Mountains (DRC), KIG: Kigezi Highlands (Uganda), NYU: Nyungwe (Rwanda), KIB: Kibira (Burundi), BAL: Bale Mountains (Ethiopia), KEN: Mount Kenya (Kenya), ABE: Aberdare Range (Kenya), KIL: Mount Kilimanjaro (Tanzania), UDZ: Udzungwa Mountains (Tanzania).

|                              | KIB | NYU | BAL | BAM | KIG | KEN | ABE | ITO | KIL | UDZ |
|------------------------------|-----|-----|-----|-----|-----|-----|-----|-----|-----|-----|
| motorbike                    | x   | x   | x   | x   | x   | x   | x   |     | x   | x   |
| high-quality house           | x   | x   | x   | x   | x   | x   |     | x   | x   | x   |
| land (given number hectares) | x   | x   | x   | x   | x   | x   | x   |     | x   |     |
| TV                           |     | x   | x   | x   | x   | x   | x   |     | x   | x   |
| cows (given number)          | x   | x   | x   |     |     | x   | x   | x   | x   |     |
| radio                        | x   | x   | x   |     | x   |     |     | x   | x   | x   |
| car                          |     | x   |     | x   | x   | x   | x   |     | x   | x   |
| shop                         | x   | x   |     |     | x   |     |     |     |     | x   |
| solar panel                  | x   |     |     |     | x   | x   |     | x   |     |     |
| pigs (given number)          | x   |     |     | x   | x   |     |     | x   |     |     |
| android phone                |     | x   |     | x   |     | x   | x   |     | x   |     |
| homeowner                    | x   |     |     | x   |     |     |     |     |     | x   |
| mobile phone                 |     |     | x   |     |     |     |     | x   |     |     |
| Eucalyptus plantation        | x   |     |     |     | x   |     |     |     |     |     |
| children (given number)      |     |     | x   |     |     |     |     |     | x   |     |
| grinder                      |     |     |     | x   |     |     |     |     |     | x   |
| bank account                 |     |     |     | x   |     |     |     | x   |     |     |
| pesticide spraying pump      |     |     |     |     |     | x   | x   |     |     |     |
| plastic chairs               |     |     |     |     |     | x   | x   |     |     |     |
| tractor                      |     |     |     |     |     |     |     |     | x   | x   |
| irrigation                   |     |     | x   |     |     |     |     |     |     | x   |
| extra house to rent          |     | x   |     |     |     |     |     |     |     |     |
| donkey (given number)        |     |     | x   |     |     |     |     |     |     |     |
| fridge                       |     |     |     |     |     |     | x   |     |     |     |
| gas cooker                   |     |     |     |     |     |     | x   |     |     |     |
| children going to school     |     |     |     |     |     |     |     | x   |     |     |
| torch                        |     |     |     |     |     |     |     | x   |     |     |
| goat (given number)          |     |     |     |     |     |     |     | x   |     |     |
